# Supplementary material for: Cytologic scoring of equine exercise-induced pulmonary hemorrhage: Performance of human experts and a deep learning-based algorithm
Source: PubMed Central journal article supplement (PMC9827485; doi:10.1177/03009858221137582), 2022-11-17
Supplement: sj-pdf-1-vet-10.1177_03009858221137582.pdf [file sj-pdf-1-vet-10.1177_03009858221137582.pdf]

## Supplemental Material

### Cytologic Scoring of Equine Exercise-Induced Pulmonary Hemorrhage: Performance of Human Experts and a Deep Learning-Based Algorithm

Christof A. Bertram <sup>1,2\*</sup>, Christian Marzahl <sup>3,4\*</sup>, Alexander Bartel <sup>2\*</sup>, Jason Stayt <sup>5</sup>, Federico Bonsembiante <sup>6</sup>, Janet Beeler-Marfisi <sup>7</sup>, Ann K. Barton <sup>2</sup>, Ginevra Brocca <sup>6</sup>, Maria E. Gelain <sup>6</sup>, Agnes Gläsel <sup>8</sup>, Kelly du Preez <sup>9</sup>, Kristina Weiler <sup>8</sup>, Christiane Weissenbacher-Lang <sup>1</sup>, Katharina Breininger <sup>3</sup>, Marc Aubreville <sup>10</sup>, Andreas Maier <sup>3</sup>, Robert Klopfleisch <sup>2</sup> and Jenny Hill <sup>5</sup>

**Supplemental Table S1.** Confusion matrix of the hemosiderin grades of alveolar macrophages assigned to the same cells by the ten annotators and the ground truth annotations.

|                        |   | Ground truth's cell grade |        |        |       |       |
|------------------------|---|---------------------------|--------|--------|-------|-------|
|                        |   | 0                         | 1      | 2      | 3     | 4     |
| Annotators' cell grade | 0 | 28,646                    | 2,448  | 87     | 16    | 0     |
|                        | 1 | 11,668                    | 25,385 | 2,821  | 53    | 8     |
|                        | 2 | 486                       | 15,215 | 15,213 | 1,784 | 5     |
|                        | 3 | 9                         | 1,147  | 7,102  | 4,503 | 160   |
|                        | 4 | 4                         | 71     | 1,051  | 2,275 | 1,060 |

For the 158,143 annotations made by the annotators, a match was found in the ground truth dataset (Euclidean distance between the annotators' and ground truth annotation of  $\leq 50$  pixels) in 121,217 (76.7%) instances. Of the 121,217 alveolar macrophages, 74,807 (61.71%) were assigned the same hemosiderin grade by the annotators and the ground truth. Of the 46,410 macrophages with divergent hemosiderin grade, 43,473 (93.67%) had a divergence by one grade level, 2,829 (6.10%) had a divergence by two grade levels, 104 (0.22%) had a divergence by three grade levels, and 4 (<0.01%) had a divergence by four grade levels.

**Supplemental Table S2.** Confusion matrix of the hemosiderin grades of alveolar macrophages assigned to the same cells by the ground truth annotator and the deep learning-based algorithm.

|                        |   | Ground truth's cell grade |        |        |        |       |
|------------------------|---|---------------------------|--------|--------|--------|-------|
|                        |   | 0                         | 1      | 2      | 3      | 4     |
| Algorithmic cell grade | 0 | 58,341                    | 2,934  | 3      | 1      | 0     |
|                        | 1 | 2,413                     | 62,627 | 2,867  | 0      | 0     |
|                        | 2 | 10                        | 4,347  | 36,516 | 1,971  | 0     |
|                        | 3 | 3                         | 4      | 1,326  | 11,615 | 263   |
|                        | 4 | 1                         | 0      | 1      | 184    | 1,223 |

For the 218,003 algorithmic predictions, a match (Euclidean distance between the pathologist's and ground truth annotation of  $\leq 50$  pixels) was found in the ground truth dataset in 186,650 (85.62%) instances. Of the 186,650 alveolar macrophages, 170,322 (91.25%) were assigned the same hemosiderin score by the ground truth annotator and the algorithm. Of the 16,328 macrophages with divergent hemosiderin grade, 16,305 (99.86%) had a divergence by one grade level, 18 (0.11%) had a divergence by two grade levels, 4 (0.02%) had a divergence by three grade levels, and 1 (<0.01%) had a divergence by four grade levels.

**Supplemental Table S3.** Confusion matrix of the hemosiderin grades of alveolar macrophages assigned to the same cells by the ten annotators and the deep learning-based algorithm.

|                        |   | Algorithmic cell grade |        |        |       |     |
|------------------------|---|------------------------|--------|--------|-------|-----|
|                        |   | 0                      | 1      | 2      | 3     | 4   |
| Annotators' cell grade | 0 | 30,228                 | 2,301  | 73     | 18    | 0   |
|                        | 1 | 11,595                 | 24,986 | 2,911  | 44    | 5   |
|                        | 2 | 426                    | 14,378 | 15,603 | 1,530 | 5   |
|                        | 3 | 10                     | 918    | 7,279  | 4,237 | 168 |
|                        | 4 | 2                      | 51     | 1,011  | 2,249 | 997 |

For the 158,143 annotations made by the annotators, a match (Euclidean distance between the annotators' and ground truth annotation of  $\leq 50$  pixels) was found in the algorithmic predictions in 121,025 (76.53%) instances. Of the 121,025 alveolar macrophages, 76,051 (62.84%) were assigned the same hemosiderin grade by the annotators and the algorithm. Of the 44,974 macrophages with divergent hemosiderin grade, 42,411 (94.30%) had a divergence by one grade level, 2,477 (5.51%) had a divergence by two grade levels, 84 (0.19%) had a divergence by three score levels, and 2 (<0.01%) had a divergence by four grade levels.

**Supplemental Table S4.** Degree of consensus by the ten annotators on exercise-induced pulmonary hemorrhage diagnosis (THS score above or below 75).

| Consensus definition        | Number of cases with consensus |                        |
|-----------------------------|--------------------------------|------------------------|
|                             | Annotator's THS                | grade-standardized THS |
| By all of the 10 annotators | 24 / 52 (46%)                  | 40 / 52 (77%)          |
| By at least 9/10 annotators | 36 / 52 (69%)                  | 47 / 52 (90%)          |
| By at least 8/10 annotators | 43 / 52 (83%)                  | 50 / 52 (96%)          |
| By at least 7/10 annotators | 49 / 52 (94%)                  | 52 / 52 (100%)         |
| By at least 6/10 annotators | 50 / 52 (96%)                  | 52 / 52 (100%)         |
| By at least 5/10 annotators | 52 / 52 (100%)                 | 52 / 52 (100%)         |

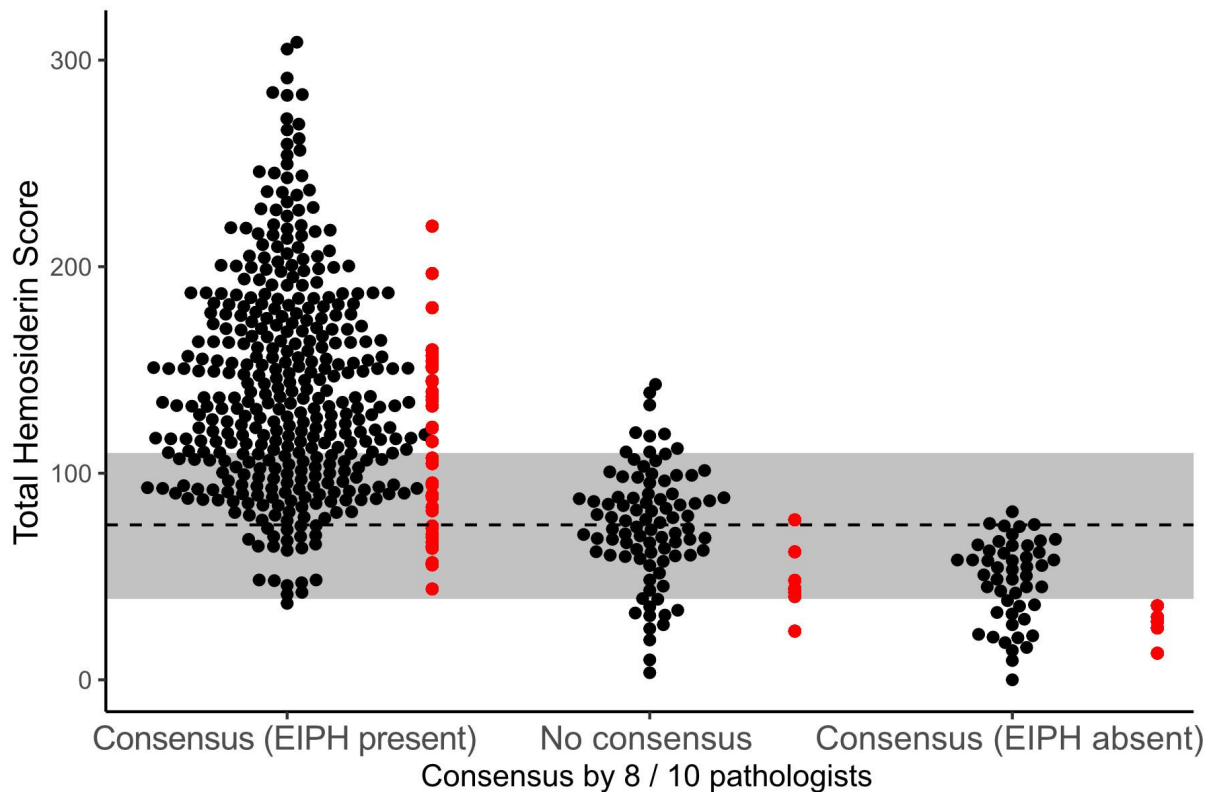

**Supplemental Fig. S1.** Scatter plots for total hemosiderin scores (THSs) determined by the ten annotators (black dots) and deep learning-based algorithm (red dots). The 52 cases are separated based on their consensus of the exercise-induced pulmonary hemorrhage (EIPH) diagnosis by 8 out of 10 annotators. The left scatter plot represents the THS values for cases with a consensus on THS values above the cut-off of 75 (N = 32), the middle scatter plot represents the THS values for cases with no consensus (N = 16) and the right scatter plot represents the THS values for cases with a consensus on THS values below the cut-off of 75 (N = 4). The broken line indicates the diagnostic cut-off at a THS of 75 and the grey bar around the broken line is the reference range determined in this study.

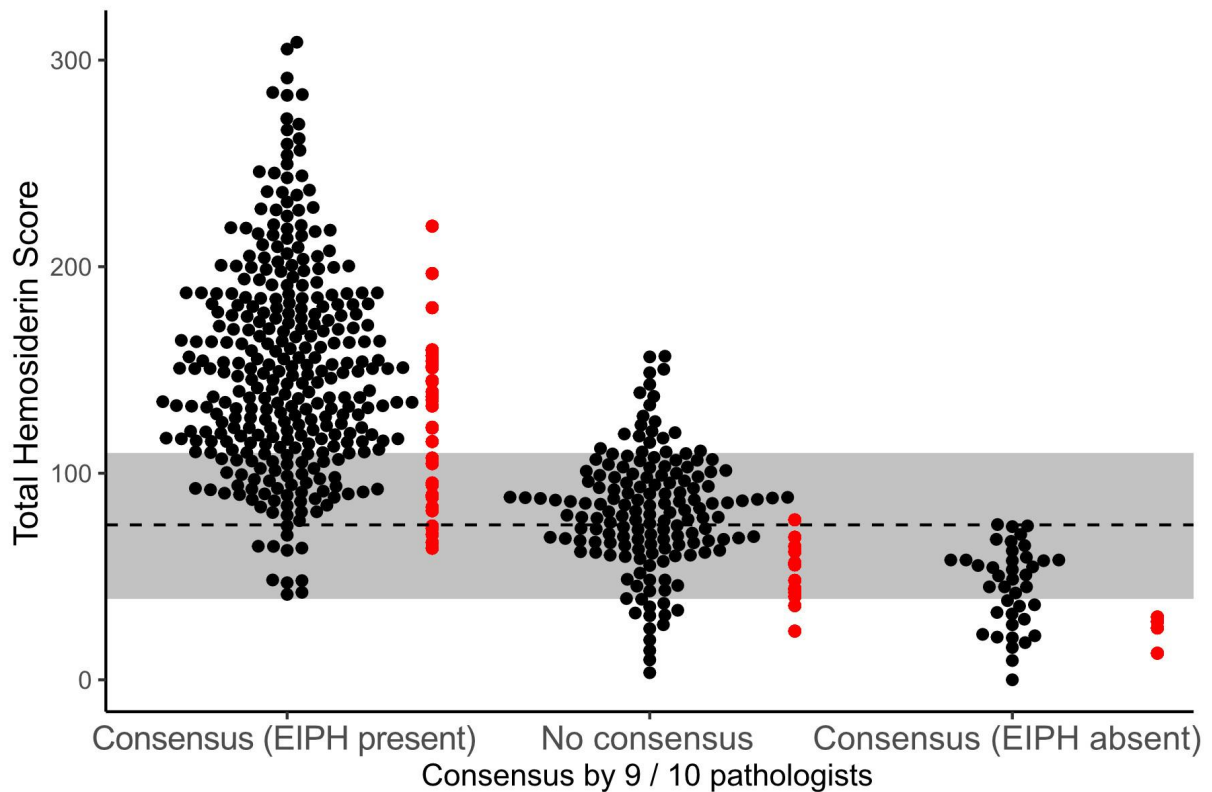

**Supplemental Fig. S2.** Scatter plots for total hemosiderin scores (THSs) determined by the ten annotators (black dots) and deep learning-based algorithm (red dots). The 52 cases are separated based on their consensus of the exercise-induced pulmonary hemorrhage (EIPH) diagnosis by 9 out of 10 annotators. The left scatter plot represents the THS values for cases with a consensus on THS values above the cut-off of 75 (N = 32), the middle scatter plot represents the THS values for cases with no consensus (N = 16) and the right scatter plot represents the THS values for cases with a consensus on THS values below the cut-off of 75 (N = 4). The broken line indicates the diagnostic cut-off at a THS of 75 and the grey bar around the broken line is the reference range determined in this study.
